# Supplementary material for: Long term rescue of Alzheimer’s deficits in vivo by one-time gene-editing of App C-terminus
Source: PubMed Central journal article supplement — bioRxiv. 2025 Jan 7:2024.06.08.598099. Originally published 2024 Jun 9. Preprint. [Version 2] doi: 10.1101/2024.06.08.598099 (PMC11185791; doi:10.1101/2024.06.08.598099), 2025-01-07
Supplement: media-1.pdf [file media-1.pdf]

- 7 Supplementary Figures + legends.
- 6 Supplementary Tables

(starts next page)

## A. Cortex from AAV-*App* gRNA injected mice

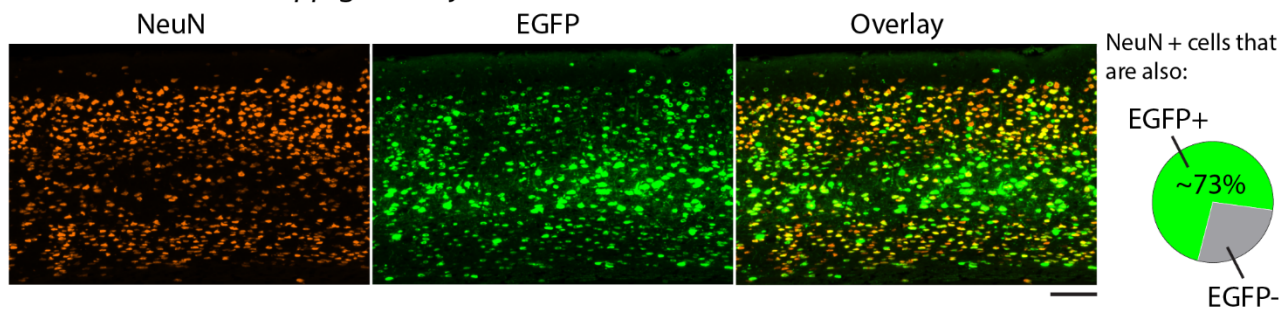

## B. Predicted on/off targeted sites

ATATCCGTTCTGCTGCATCTTGG on-target APP

ATgTCCaTTCTGCTGCAcCTCGG off-target chr7

ATATCCGTTCTGCTcttTCTTGG off-target chr4

ATcTCCGTTCTGggGCATCTGGG off-target chr10

ATATCaGTTCTGTtTGtATCTGGG off-target chr18

ATcTcTcGTTCTaCTGCATCTTGG off-target chr3

## C. On-target ICE analyses

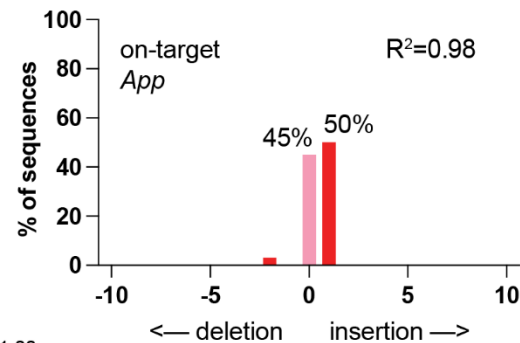

## D. Off-target ICE analyses

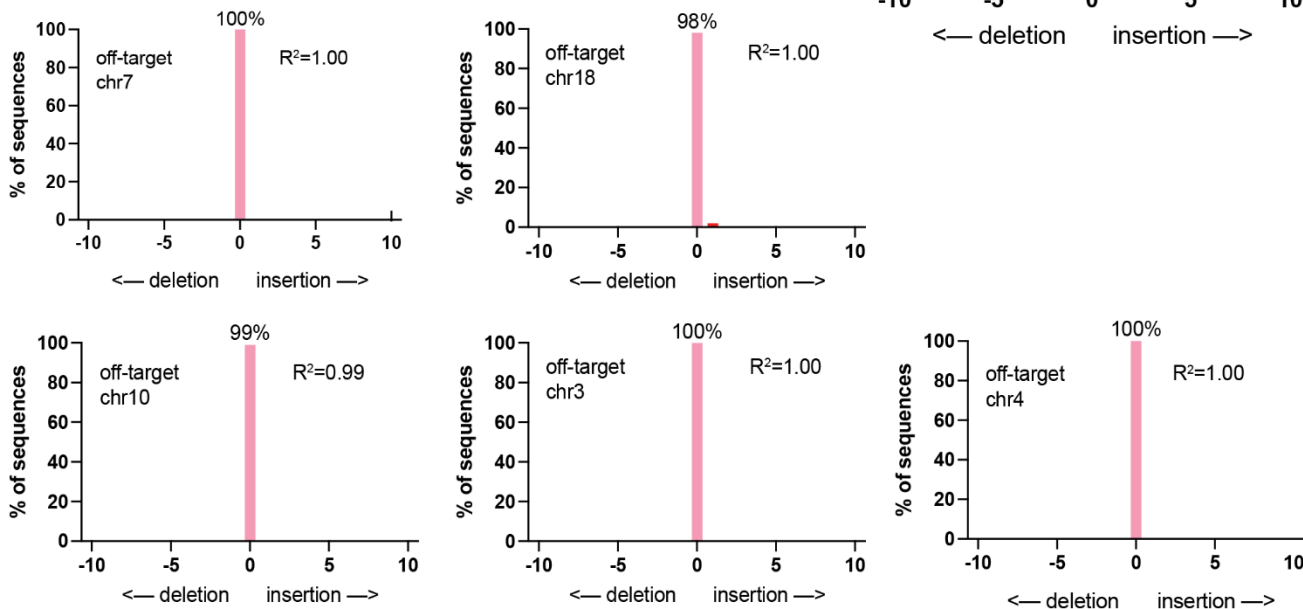

### Supplementary Figure 1: Further characterization of histology and genomics (related to main Fig. 1).

**A)** Sections from one-year old mouse brains (SpCas9-KI) injected with AAV-PHP.eb-*App*-gRNA (EGFP-tagged), and two-color immunostained for NeuN (neuronal nuclei) and EGFP to determine fraction of transduced neurons. Pie chart on right shows the mean number of neurons that were transduced (N = 3 mice per condition, 8 cortical regions and ~ 1000 neurons were analyzed from each animal). These results are consistent with previously published estimates using the AAV-PHP.eb capsid. Scale bar = 100  $\mu$ m

**B)** Alignment of on-target *App* gRNA site (top row, dashed red box) with predicted off-target sites contain  $\leq 3$  mismatches (using Cas-OFFinder). All PAM sites are underlined, and nucleotide mismatches in the off-target sites are highlighted in yellow/lowercase.

**C, D)** On-target (**C**) and off-target (**D**) Interference of CRISPR Edits (ICE) analysis of DNA from cortices from *App*-KI/SpCas9-KI mice AAV-injected with *App*-gRNA. Data plotted as frequency of predicted editing outcome (size of insertion or deletion as a percentage to total sequences). Correlation with expected variant percentages ( $R^2$ ) are noted. Note the extremely low frequency of detectable edits within predicted off-target sites.

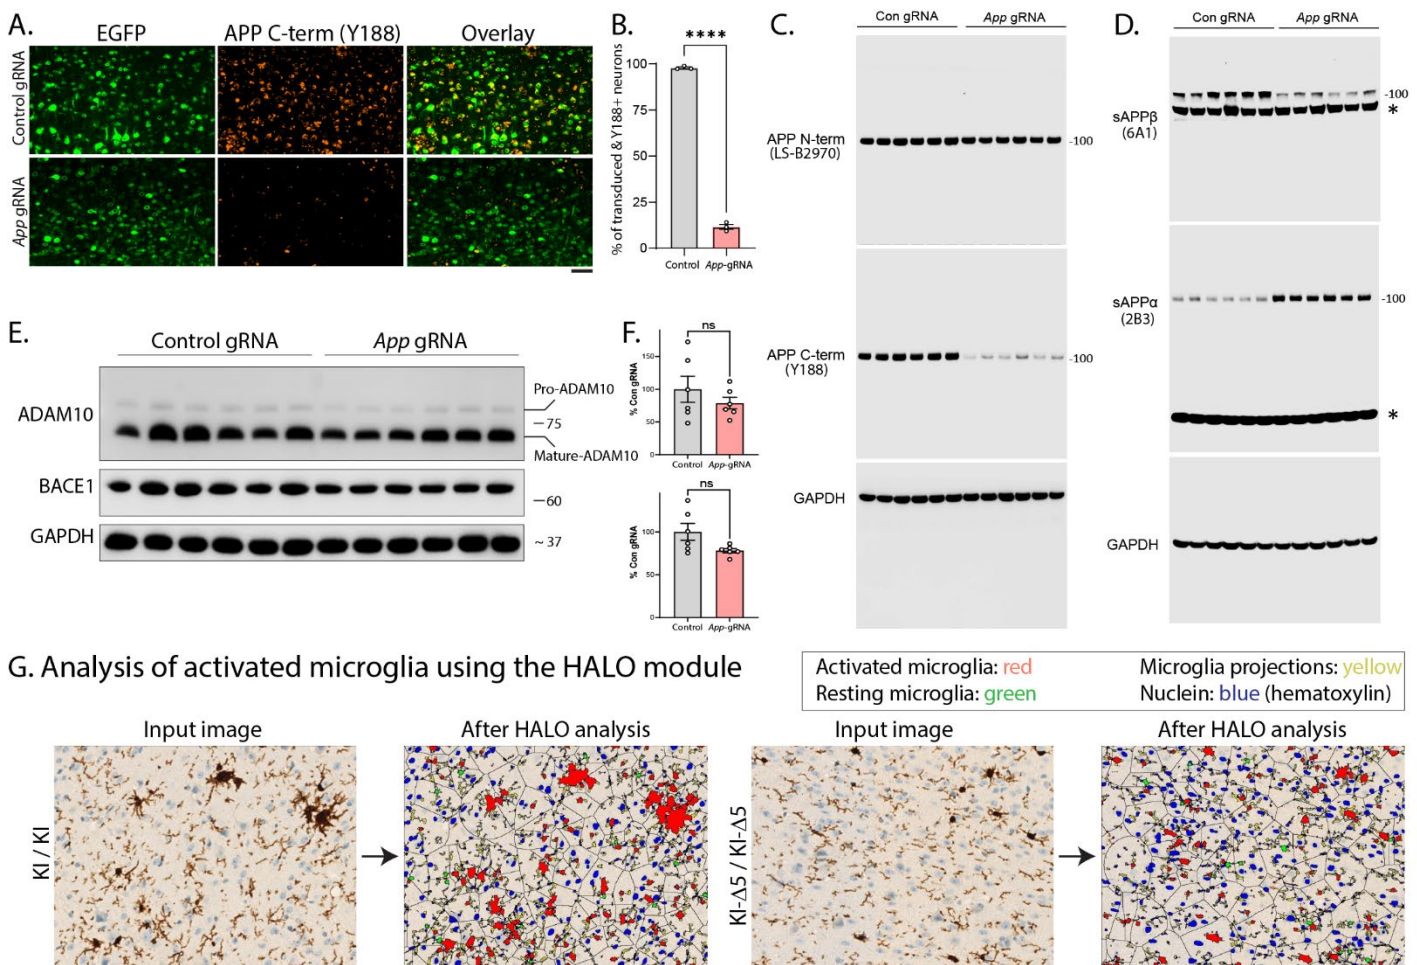

**Supplementary Figure 2: Further characterization and analyses of AAV-driven *in vivo* CRISPR editing (related to main Figs. 1/2).**

**A)** Sections from one-year old SpCas9-KI mouse brains injected with AAV-PHP.eb-*App*-gRNA (EGFP-tagged) or scrambled-gRNA control, and stained for EGFP and Y188 (APP C-terminus antibody) to determine fraction of transduced neurons that also lacked the APP C-terminus; quantified in **B)**. Data shown as mean +/- SEM percentage of EGFP positive neurons that also showed Y188 staining (N = 3 mice per condition, (seven cortical areas were sampled, and >1000 cells were analyzed from each mouse). Note that a large fraction of *App*-gRNA transduced neurons lacked Y188 staining. Scale bar = 50 μm.

**C, D)** Full gels from **Figures 1 H)** and **1 I)**, asterisk (\*) marks non-specific bands.

**E, F)** One-year old SpCas9-KI mice were injected with AAVs carrying *App*-gRNA or scrambled-gRNA control, and brains were immunoblotted for APP secretases ADAM10 and BACE1; quantified in **F)**. Data shown as mean +/- SEM, expressed as a percentage of control-gRNA injected group (N = 6 mice for each condition, ns = non-significant). Note that there are no significant changes in the levels of secretases after *App* C-terminus editing.

**G)** Automated detection of activated microglia by HALO module software in *App*-KI and *App*-KI-Δ5 tissue sections stained for Iba-1.

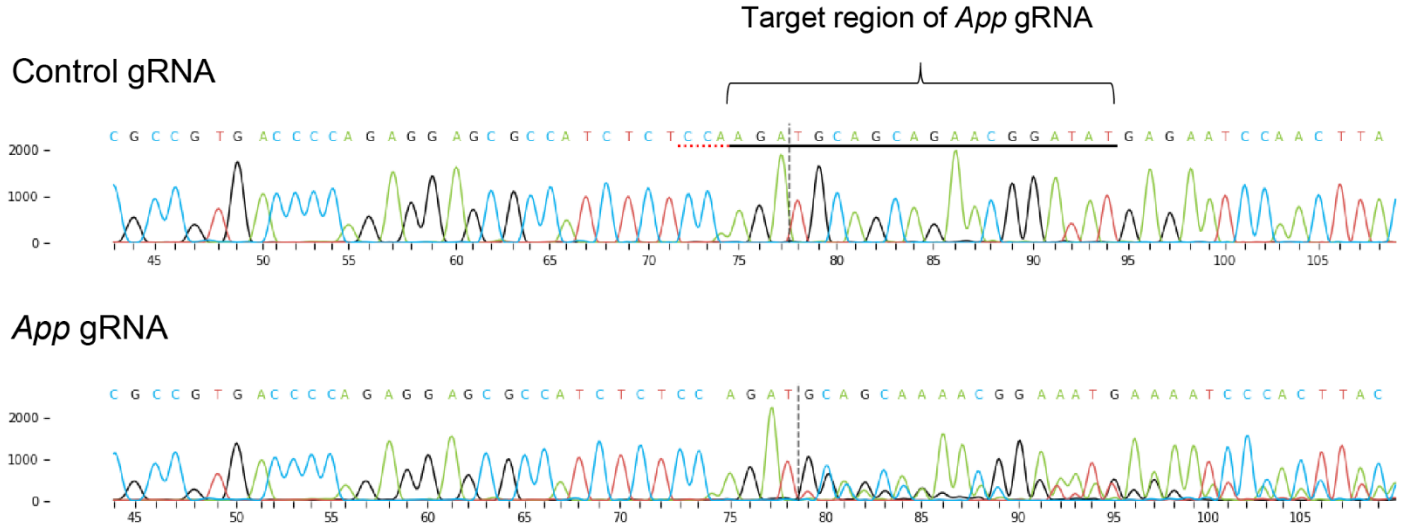

**Supplementary Figure 3: Confirmation of *App*-editing in hippocampal slices used for LTP analyses (related to main Fig. 2).**  
 Sanger sequencing confirmation of editing in slices used for LTP experiments. Primers flanking the target site of the *App* gRNA (labeled in the figure) were designed, and amplicons were produced from the genomic DNA of tissue slices. These amplicons were sequenced to confirm CRISPR-editing. Note nucleotide-mismatch within targeted *App*-gRNA loci, that is seen only in AAV-*App*-gRNA injected brains.

**A. Control:** U6-control-gRNA + hSyn1-EGFP:KASH  
**App-gRNA:** U6-*App*-676/659-gRNA + hSyn1-EGFP:KASH

*App*-gRNA packaged  
in AAV-PHP.eB

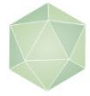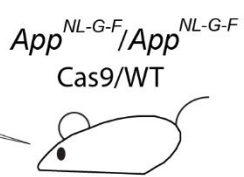

**B.** Genomic target  
*APP659:* 5'— cacatccatccatcatggcgtggtggaggt —3'  
*APP676:* 5'— ctcatatccgttctgctgcatcttggagag —3'

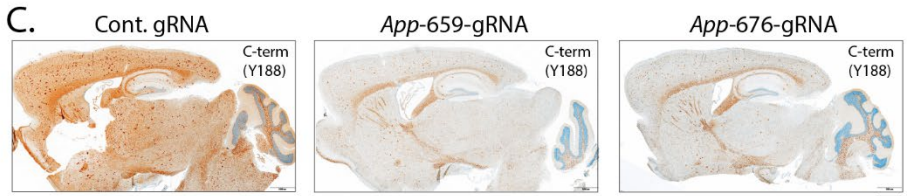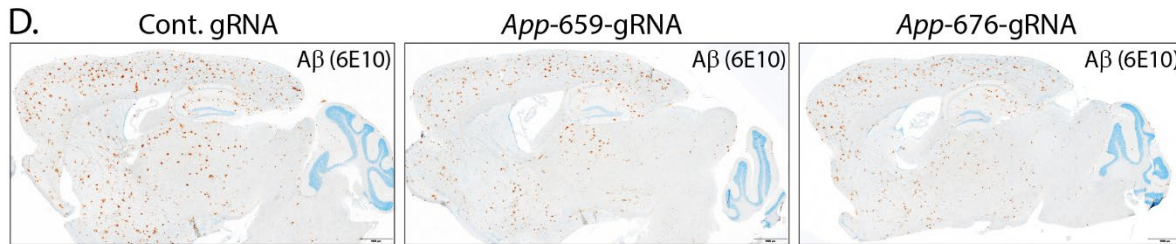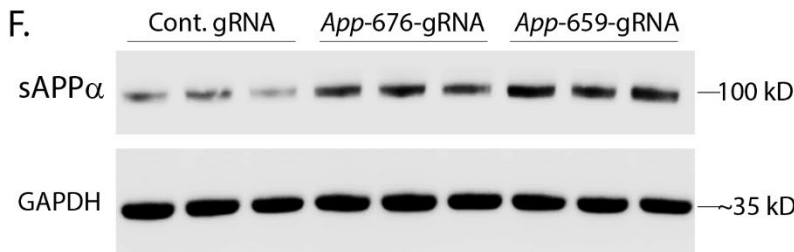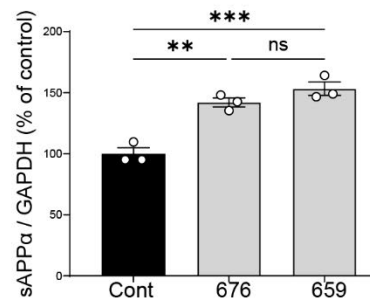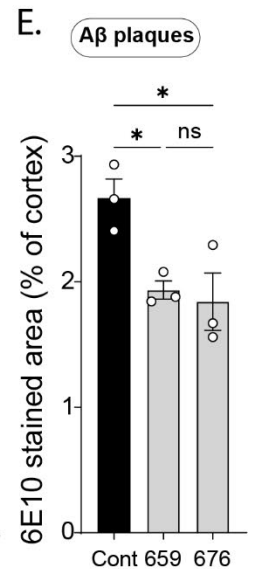

**Supplementary Figure 4: Comparison of *App*-659 and *App*-676 gRNA (related to main Figs. 2/3).**

- A)** Experimental design to inject AAV-*App*-659/676 gRNA by intravenous injection in *App*-KI/*Cas9*-KI mice.
- B)** Genomic targets and predicted cut-sites (red arrowheads) in *App* for 659/676gRNAs, PAM sites highlighted yellow.
- C)** Staining of the extreme APP C-terminus (Y188 antibody) in control and 659/676-gRNA injected mouse brains. Note attenuated staining in *App*-gRNA injected brains, indicating C-terminal truncation of protein.
- D-E)** Attenuated Aβ deposition in 659/676-gRNA injected mouse brains.
- F)** Western blots from mouse brains to examine sAPPα shows an increase in 659/676-gRNA injected mouse brains.

All data shown as mean +/- SEM, expressed as a percentage of control. N = 3 mice/group, \*p < 0.01, \*\*p < 0.001, \*\*\*p < 0.0001, ns = non-significant.



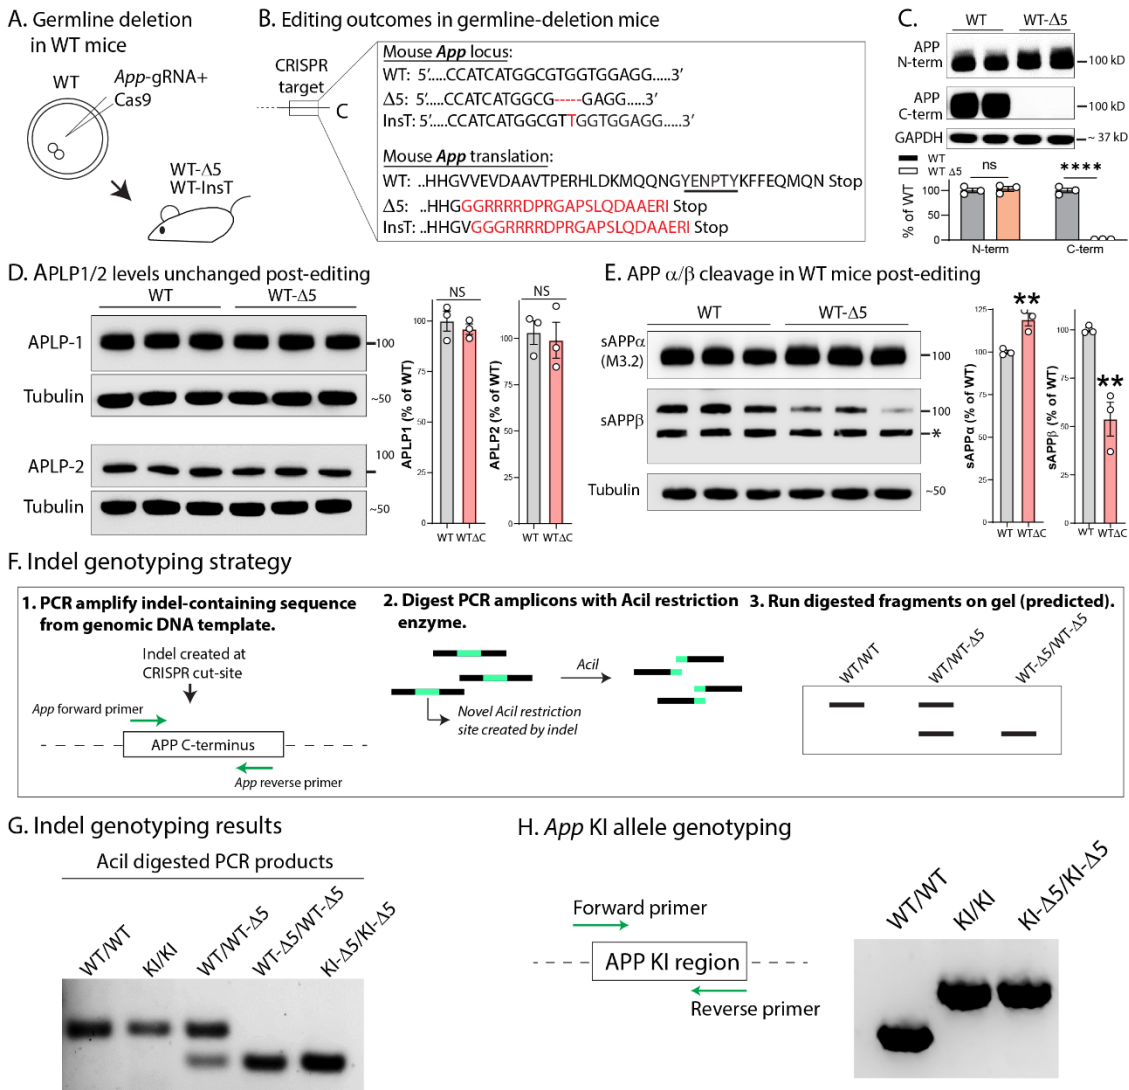

**Supplementary Figure 5: Further characterization of *App*-KI and *App*-KIΔ5/InsT mouse brains (related to main Fig. 3).**

**A)** Zygotes from WT mice were injected with *App*-gRNA/Cas9 ribonucleoprotein complexes targeting the *App* C-terminus, and resulting founders were screened and outbred to produce stable heterozygous and homozygous lines.

**B)** Two edited strains with effective deletion of the last ~35 amino acids were selected. Schematic and sequences show the edited mouse *App* loci and expected translational products. Note that one strain has deletion of 5 amino acids (D5), and the other has a single amino-acid insertion (Insert-T) that lead to indels and premature stop codons.

**C)** Western blots of edited WT mouse brains using antibodies to APP N- and C-terminus. Note that the C-terminus Y188 antibody is unable to recognize APP, while signal from the N-terminus antibody is intact.

**D)** Western blots for APLP1 and APLP2 levels (APP homologues) in cortical/hippocampal lysates from WT and WT-Δ5 mice; quantified on right. Data expressed as mean +/- SEM, expressed as a percentage of WT. N = 3 mice per condition, NS = non-significant.

**E)** Western blots for sAPPα and sAPPβ in cortical/hippocampal lysates from WT and WT-Δ5 mice. Asterisk (\*) indicates a non-specific band. Data shown as mean +/- SEM, expressed as a percentage of WT. N = 3 mice/group, \*\*p < 0.001.

**F)** Genotyping strategy to identify Δ5bp indel in *App* genomic deletion mice. Deletion of the 5bp generates a novel restriction-site that was digested by the restriction-enzyme *Acil*, allowing us to identify the genomically

deleted mice. Specifically, indel-containing sequences were PCR-amplified, digested with *Acil*, and the digested fragments were run on agarose gels to identify genomically deleted animals.

**G)** DNA gel of PCR products from WT and *App*-KI mice after digestion with *Acil*. Note that genomic deletion of the *App* C-terminus (right 3 lanes) generates a cleavage product that runs as a lower band.

**H)** Genotyping to confirm retention of the *App* knock-in allele in KI- $\Delta$ 5bp mice. Note that presence of the *App*-KI allele leads to an upper band, allowing identification of KI animals.

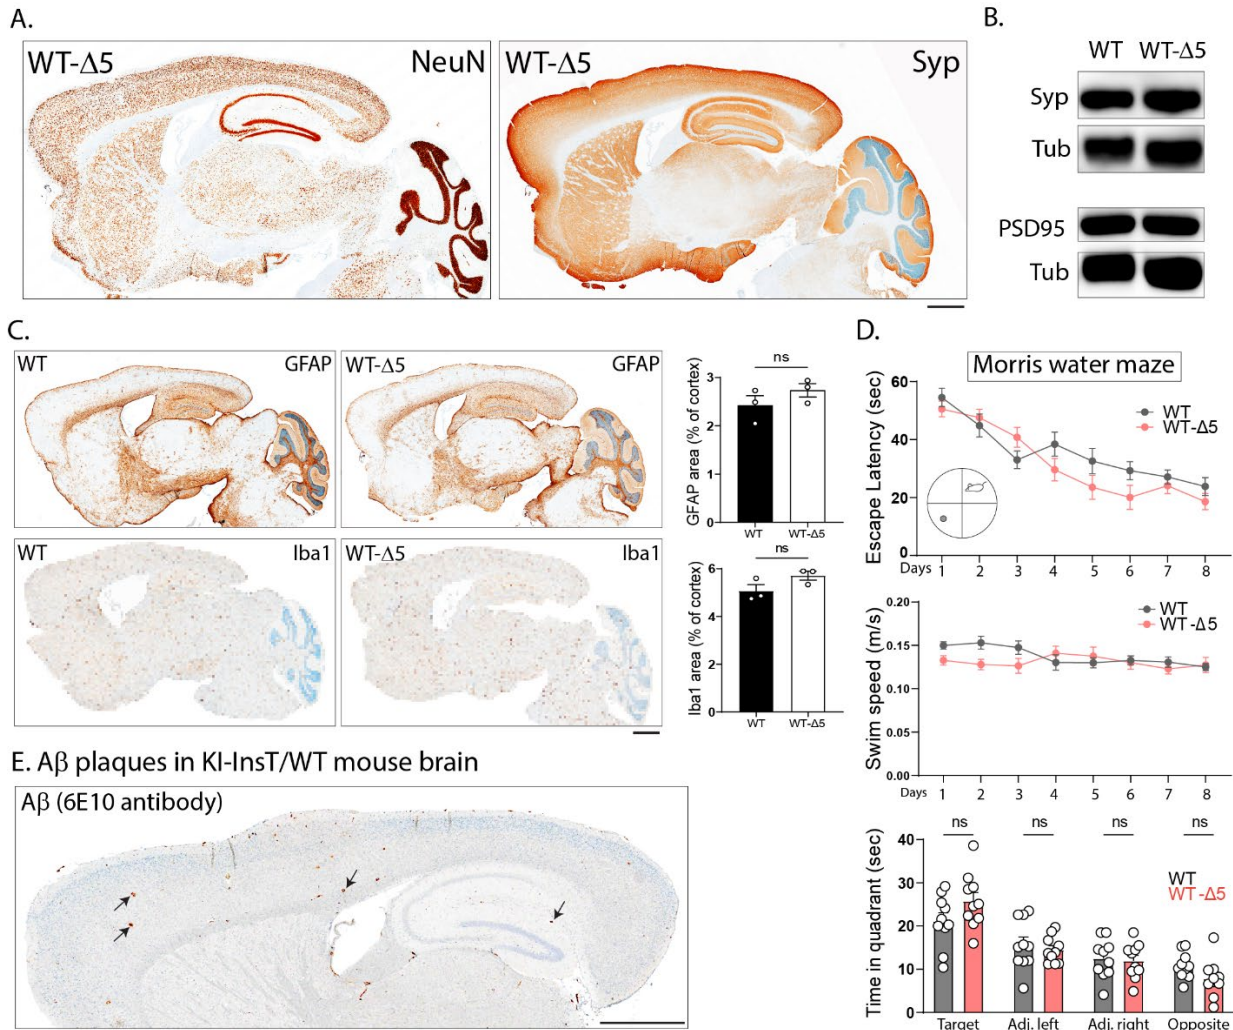

**Supplementary Figure 6: Safety evaluation of *App*-editing in WT mice (related to main Fig. 3).**

**A)** Neuronal (NeuN) and synaptic (synaptophysin) staining in the WT germline-edited mice (*App*-D5, a strain that effectively lacks the YENPTY-motif). Note that the brains appear grossly normal. Immunoblots of pre- and post-synaptic markers in **B)**. Scale bar = 1mm.

**C)** Comparison of astrocytes and microglia show no significant changes in the WT germline-edited mouse brains, compared to WT controls; quantified on right. Scale bar = 1mm.

**D)** Morris water maze test for memory does not show any deficits in WT germline-edited mouse brains, compared to WT controls (escape latency – top, swim speed – middle, probe-trial results – bottom).

**E)** Representative image of A $\beta$  (6E10) staining in *App*-KI-InsT/WT heterozygous mice lacking the last ~ 35 amino acids of APP. Note that plaques are rarely seen in this setting (few marked with small arrows). Quantification of A $\beta$  in these mice is shown in **Figure 3C** Scale bars = 1mm, data are shown as mean +/- SEM. N = 3/condition for **C)**, and 10/condition for **D)**, ns = non-significant.
